# Supplementary material for: 3D interconnected hierarchically macro-mesoporous TiO2 networks optimized by biomolecular self-assembly for high performance lithium ion batteries
Source: Royal Society of Chemistry journal article supplement (doi:10.1039/c6ra00332j), 2016-01-01
Supplement: c6ra00332j1.pdf [file c6ra00332j1.pdf]

## Supporting Information

### **3D Interconnected Hierarchically Macro-mesoporous TiO<sub>2</sub> Network Optimized by Biomolecular Self-assembly for High Performance Lithium Ion Battery**

Xiao-Ning Ren,<sup>†a</sup> Liang Wu,<sup>†a</sup> Jun Jin,<sup>a</sup> Jing Liu,<sup>a</sup> Zhi-Yi Hu,<sup>b</sup> Yu Li,<sup>\*a</sup> Tawfique Hasan,<sup>c</sup>  
Xiao-Yu Yang,<sup>a</sup> Gustaaf Van Tendeloo<sup>b</sup> and Bao-Lian Su<sup>\*a,d,e</sup>

<sup>a</sup>Laboratory of Living Materials at the State Key Laboratory of Advanced Technology for Materials Synthesis and Processing, Wuhan University of Technology, 122 Luoshi Road, 430070, Wuhan, Hubei, China; Email: [yu.li@whut.edu.cn](mailto:yu.li@whut.edu.cn); [baoliansu@whut.edu.cn](mailto:baoliansu@whut.edu.cn).

<sup>b</sup>EMAT (Electron Microscopy for Materials Science), University of Antwerp, 171 Groenenborgerlaan, B-2020 Antwerp, Belgium.

<sup>c</sup>Cambridge Graphene Centre, University of Cambridge, 9 JJ Thomson Avenue, Cambridge CB3 0FA, United Kingdom

<sup>d</sup>Laboratory of Inorganic Materials Chemistry (CMI), University of Namur, 61 rue de Bruxelles, B-5000 Namur, Belgium; E-mail: [bao-lian.su@unamur.be](mailto:bao-lian.su@unamur.be)

<sup>e</sup>Department of Chemistry and Clare Hall, University of Cambridge, Cambridge CB21 9EW, United Kingdom; E-mail: [bls26@cam.ac.uk](mailto:bls26@cam.ac.uk)

<sup>†</sup> These two authors contributed equally to this work.

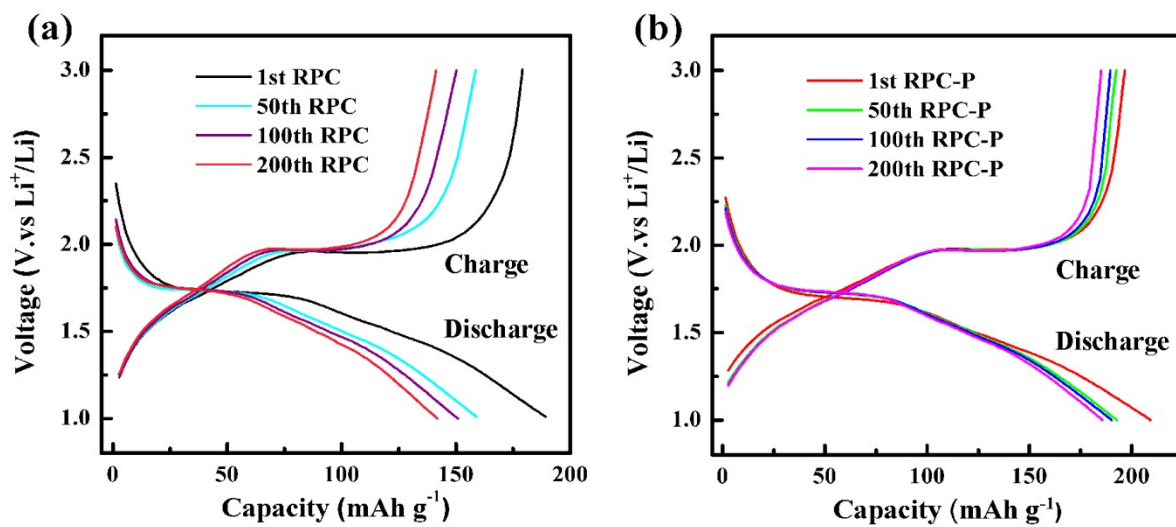

**Figure S1.** Charge and discharge curves of (a) RPC TiO<sub>2</sub> and (b) RPC-P TiO<sub>2</sub> at the 1<sup>st</sup>, 50<sup>th</sup>, 100<sup>th</sup> and 200<sup>th</sup> cycle at 1C.

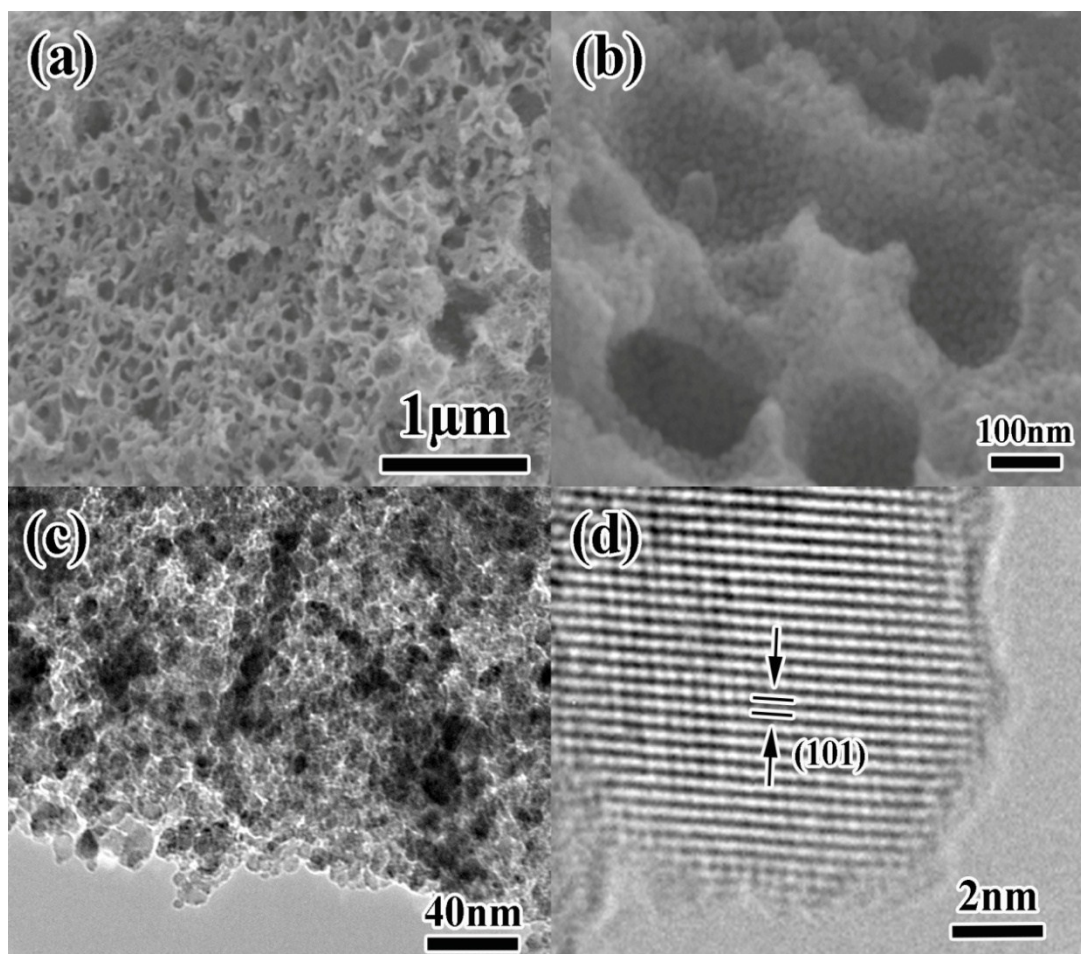

**Figure S2.** (a,b) SEM images and (c,d) TEM images of the as-prepared RPC TiO<sub>2</sub>. The SEM image in (a) clearly shows the macroporous structure. The SEM image in (b) displays the nanoparticles constructed the walls. The TEM image in (c) reveals the inter-particles mesopores (also called worm-like mesopores). The HRTEM image presents the (101) crystal plane of one anatase nanoparticle.

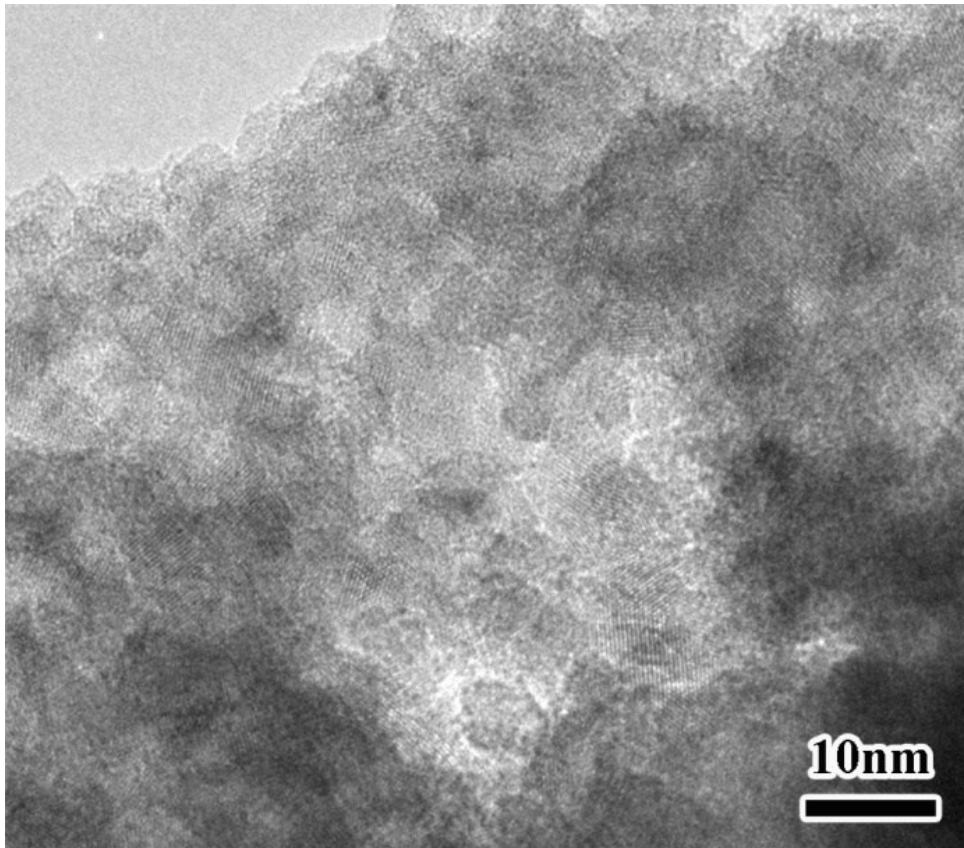

**Figure S3.** The HRTEM image of RPC-P TiO<sub>2</sub> at 2C after 1000 cycles, clearly demonstrating the remained inner-particle mesopores.
